# Supplementary material for: Intra-host symbiont diversity in eastern Pacific cold seep tubeworms identified by the 16S-V6 region, but undetected by the 16S-V4 region
Source: PLoS One. 2020 Jan 15;15(1):e0227053. doi: 10.1371/journal.pone.0227053 (PMC6961877; doi:10.1371/journal.pone.0227053)
Supplement: S2 Table — Most analyses were done in L. barhami individual #45 as the trophosome tissue was optimally preserved. Positive signals for the Seep symbiont 1 (Ssym1) and EUBI-III probes were observed in well preserved sections of other E. spicata and L. barhami individuals. Results exclude initial tests to identify the correct formamide concentration for the different probes. The EUBI-III and NON probes were not used in all slides after establishing that they consistently provided positive and negative signals, respectively. (XLSX) [file pone.0227053.s008.xlsx]

## Sheet: S2 Table
S2 Table Summary of mono and double CARD-FISH results for each slide investigated. Most analyses were done in L. barhami individual #45 as the trophosome tissue was optimally preserved. Positive signals for the Seep symbiont 1 (Ssym1) and EUBI-III probes were observed in well preserved sections of other E. spicata and L. barhami individuals.
Results exclude initial tests to identify the correct formamide concentration for the different probes. The EUBI-III and NON probes were not used in all slides after establishing that they consistently provided positive and negative signals, respectively.
Specimen	Slide #	Date	Mono	Double	Ssym1 (section #)	Lmars1 (section #)	EUBI-III (section #)	NON (section #)	Result
ES9	30	Mar 2018	x			7	6		EUB positive. Lmars1 negative and absent.
ES9	32	Mar 2018	x			7	6		EUB positive. Lmars1 negative and absent.
ES9	34	Mar 2018		x	1+2*, 5+6*			7	NON negative. Ssym1 positive and present.
ES9	37	Mar 2018	x			7	6		EUB positive. Lmars1 negative and absent.
LB45	17	Mar 2018	x		6		7		EUB positive. Ssym1 positive and present.
LB45	20	Mar 2018		x	1+5	5, 6–8*	1–4	9	NON negative. EUB positive. Lmars1 positive and present.
LB45	21	Mar 2018		x	2+3*, 6+7*		8	1	NON negative. EUB positive. Ssym1 positive and present.
LB45	23	Mar 2018	x			7	6		EUB positive. Lmars1 negative and absent.
LB45	24	Mar 2018	x			7	6		EUB positive. Lmars1 positive and present.
LB45	25	Mar 2018	x			7	6		EUB positive. Lmars1 positive and present.
ES19	17	Jun 2018		x	1–6		1–6		EUB positive. Ssym1 negative and absent.
ES19	18	Jun 2018		x	1–6*			7	No signals. Hybridization failed or Ssym1 absent. Possibly poor quality tissue section.
LB33	13	Jun 2018		x	1–6*			7	NON negative. Ssym1 positive and present.
LB39	2	Jun 2018		x	1–6*			7	NON negative. Ssym1 positive and present.
LB45	2	Jun 2018		x	1–6	1–6			Ssym1 positive and present. Lmars1 negative and absent.
LB45	3	Jun 2018		x	1–6	1–6			No signals. Hybridization failed.
LB45	5	Jun 2018		x	1–5*			6	NON negative. Ssym1 positive and present.
LB45	10	Jun 2018		x	1–5*			6	No signals. Hybridization failed.
LB45	13	Jun 2018		x	1–6	1–6		7	NON negative. Positive signal for Ssym1, but not Lmars1. Lmars1 absent.
LB45	15	Jun 2018		x	1–5	1–3	4–5	6	NON negative. Positive signal for EUB, but not for Ssym1 or Lmars1. Double hybridization failed.
LB45	16	Jun 2018		x	1–6		1–6	7	NON negative. Positive signals for EUB and Ssym1 in section 6.
LB45	20	Jun 2018		x	1–6	1–3	4–6	7	NON negative. Positive signal for Ssym1 and EUB, but not Lmars1. Lmars1 absent.
LB45	22	Jun 2018		x	1–6*				Ssym1 positive and present.
LB45	23	Jun 2018		x	1–6*			7	No signals. Hybridization failed or Ssym1 absent. Possibly poor quality tissue section.
LB45	24	Jun 2018		x	1–6*			7	No signals. Hybridization failed or Ssym1 absent. Possibly poor quality tissue section.
LB45	25	Jun 2018		x		1–3*	4–5*	6	NON negative. EUB positive. Lmars1 negative and absent.
LB45	26	Jun 2018		x	1–6	1–6			Ssym1 positive and present only in sections 1–3. Lmars1 negative and absent in sections 1–3. Double hybridization failed in other sections.
LB45	29	Jun 2018		x	1–6*			7	NON negative. Ssym1 positive and present.
*Double hybridization with nonfunctional test probes
